# Supplementary material
Source: Copernicus journal article supplement (doi:10.5194/egusphere-2026-1743)
Supplement: Supplementary file 1 [file egusphere-2026-1743-supplement.pdf]

# Molecular-Level Characterization of Urban Aerosol Analogues in Controlled Atmospheric Simulations

Elie Al Marj<sup>1</sup>, Ambre Delater<sup>1</sup>, Aline Gratien<sup>1</sup>, Marie Line Torrijos<sup>1</sup>, Juan Camilo Macias Rodriguez<sup>1</sup>, Mathieu Cazaunau<sup>2</sup>, Edouard Pangui<sup>2</sup>, Antonin Bergé<sup>2</sup>, Cécile Gaimoz<sup>2</sup>, Thomas Bertin<sup>2</sup>, Emmanuelle Mebold<sup>2</sup>, Bénédicte Picquet-Varrault<sup>2</sup>, Jean-François Doussin<sup>2</sup>, Clément Buissot<sup>3</sup>, Sophie Lanone<sup>3</sup>, Patrice Coll<sup>1</sup>

<sup>1</sup> Université Paris Cité and Univ Paris Est Creteil, CNRS, LISA, F-75013 Paris, France

<sup>2</sup> Univ Paris Est Creteil and Université Paris Cité, CNRS, LISA, F-94010 Créteil, France

<sup>3</sup> Univ Paris Est Creteil, INSERM, IMRB, F-94010 Créteil, France

Correspondence to: Patrice Coll (pcoll@lisa.ipsl.fr)

## S1 Aerosols Density Estimation

Bulk aerosol density was determined from chemical composition data following the equation provided by (Salcedo et al., 2006):

$$\rho = \frac{[\text{SO}_4^{2-}] + [\text{NH}_4^+] + [\text{NO}_3^-] + [\text{Cl}^-] + [\text{Organics}]}{\frac{[\text{SO}_4^{2-}] + [\text{NH}_4^+] + [\text{NO}_3^-]}{1.75} + \frac{[\text{Cl}^-]}{1.52} + \frac{[\text{Organics}]}{1.2}}$$

This approach calculated aerosol densities of 1.6 g.cm<sup>-3</sup> for standard urban scenarios and 1.48 g.cm<sup>-3</sup> for biomass burning enhanced scenarios, allowing a total PM mass determined using TOF-ACSM in agreement with that given by SMPS.

## S2 Identification and Quantification of VOCs Concentrations

The concentrations of compounds identified (based on their  $m/z$  ...) by PTR-TOF-MS are calculated using the equation established by (de Gouw and Warneke, 2007) and (Michoud et al., 2017).

$$[\text{X}] = \frac{i_{\text{X}_{\text{net}}}}{500 \cdot i_{\text{H}_3\text{O}^+} + 250 \cdot X_r \cdot i_{\text{H}_3\text{O}^+ (\text{H}_2\text{O})}} \times \frac{150\,000}{R_{f,\text{X}}}$$

Where:

[X] is the concentration of the detected mass (ppb).

$i_{\text{X}_{\text{net}}}$  is the net signal relative to the detected mass.

$i_{\text{H}_3\text{O}^+}$  and  $i_{\text{H}_3\text{O}^+ (\text{H}_2\text{O})}$  are the relative signals at  $m/z = 21$  and  $m/z = 39$ , respectively, to avoid detector saturation.

$X_r$  is the sensitivity factor of the signal to relative humidity ( $X_r = 0.5$ ). It is crucial to perform calibrations at different relative humidity values to determine the value of  $X_r$ . This ensures that the sensitivity  $X_r$  is independent of relative humidity.

$R_{f,\text{X}}$  is the response coefficient of the PTR-TOF-MS, experimentally determined for each compound.

Throughout the experiments, we quantified 23 distinct VOCs, as documented in **Table S1**.

**Table S1: Identified PTR-TOF-MS peaks, their chemical classification, Log(C\*) (determined using “UManSysProp” web platform) and concentrations observed for the simulated atmospheres. Concentration values represent means  $\pm$  standard deviations over the experimental period.**

| <i>m/z</i> | Potential identified species                                             | Chemical classification       | O:C  | Log(C*) | Urban scenario concentration (ppb) | Biomass burning scenario concentration (ppb) |
|------------|--------------------------------------------------------------------------|-------------------------------|------|---------|------------------------------------|----------------------------------------------|
| 31.011     | Formaldehyde - CH <sub>2</sub> O                                         | Carbonyl (Aldehyde)           | 1.00 | 8.29    | 14.13 $\pm$ 6.69                   | 14.35 $\pm$ 2.19                             |
| 33.033     | Methanol - CH <sub>3</sub> OH                                            | Alcohol                       | 1.00 | 8.29    | 48.88 $\pm$ 30.89                  | 50.56 $\pm$ 27.80                            |
| 41.031     | Propadiene - C <sub>3</sub> H <sub>4</sub>                               | Hydrocarbon (Alkene)          | 0.00 | 9.34    | 6.20 $\pm$ 2.01                    | 11.87 $\pm$ 2.58                             |
| 42.029     | Acetonitrile - C <sub>2</sub> H <sub>3</sub> N                           | Nitrile                       | 0.00 | 8.01    | 2.63 $\pm$ 0.49                    | 2.36 $\pm$ 0.26                              |
| 45.041     | Acetaldehyde - C <sub>2</sub> H <sub>4</sub> O <sub>2</sub>              | Carbonyl (Aldehyde)           | 1.00 | 5.81    | 1.93 $\pm$ 1.12                    | 8.89 $\pm$ 2.22                              |
| 47.013     | Formic acid - CH <sub>2</sub> O <sub>2</sub>                             | Carboxylic acid               | 2.00 | 6.09    | 13.74 $\pm$ 7.47                   | 25.94 $\pm$ 5.91                             |
| 55.059     | 1,3-butadiene - C <sub>4</sub> H <sub>6</sub>                            | Hydrocarbon (Alkene)          | 0.00 | 8.86    | 13.18 $\pm$ 6.11                   | 18.18 $\pm$ 12.97                            |
| 57.056     | Acrolein - C <sub>3</sub> H <sub>4</sub> O                               | Carbonyl (Aldehyde)           | 0.33 | 7.49    | 0.96 $\pm$ 0.36                    | 1.07 $\pm$ 0.31                              |
| 59.035     | Acetone - C <sub>3</sub> H <sub>6</sub> O                                | Carbonyl (Ketone)             | 0.33 | 7.49    | 7.34 $\pm$ 4.13                    | 8.20 $\pm$ 1.98                              |
| 61.034     | Acetic acid - C <sub>2</sub> H <sub>4</sub> O <sub>2</sub>               | Carboxylic acid               | 1.00 | 5.81    | 22.14 $\pm$ 15.86                  | 76.64 $\pm$ 36.64                            |
| 62.016     | Nitromethane - CH <sub>3</sub> NO <sub>2</sub>                           | Hydrocarbon (Nitro-compound)  | 2.00 | 4.29    | 9.64 $\pm$ 2.58                    | 12.70 $\pm$ 2.20                             |
| 62.992     | Ethylene glycol - C <sub>2</sub> H <sub>6</sub> O <sub>2</sub>           | Alcohol                       | 1.00 | 5.81    | 25.00 $\pm$ 6.39                   | 17.75 $\pm$ 3.44                             |
| 69.048     | Furan - C <sub>4</sub> H <sub>4</sub> O                                  | Furan                         | 0.25 | 7.04    | 3.39 $\pm$ 0.73                    | 2.58 $\pm$ 1.86                              |
| 71.056     | Methyl-vinyl ketone (MVK) - C <sub>4</sub> H <sub>6</sub> O              | Carbonyl (Ketone)             | 0.25 | 7.04    | 2.53 $\pm$ 1.28                    | 3.70 $\pm$ 2.19                              |
| 73.038     | Methylglyoxal - C <sub>3</sub> H <sub>4</sub> O <sub>2</sub> (Precursor) | Carbonyl (Aldehyde)           | 0.67 | 5.46    | 8.14 $\pm$ 3.73                    | 6.58 $\pm$ 3.46                              |
| 75.045     | Glyoxylic acid - C <sub>2</sub> H <sub>2</sub> O <sub>3</sub>            | Carboxylic acid               | 1.50 | 3.63    | 30.21 $\pm$ 17.33                  | 48.50 $\pm$ 22.46                            |
| 83.086     | 2-methylfuran - C <sub>5</sub> H <sub>6</sub> O                          | Furan                         | 0.20 | 6.59    | 10.24 $\pm$ 4.59                   | 16.22 $\pm$ 9.36                             |
| 85.013     | Ethyl vinyl ketone (EVK) - C <sub>5</sub> H <sub>8</sub> O               | Carbonyl (Ketone)             | 0.20 | 6.59    | 8.84 $\pm$ 4.14                    | 20.91 $\pm$ 4.85                             |
| 89.024     | Butanoic acid - C <sub>4</sub> H <sub>8</sub> O <sub>2</sub>             | Carboxylic acid               | 0.50 | 5.06    | 24.55 $\pm$ 13.37                  | 26.66 $\pm$ 17.94                            |
| 93.036     | Toluene - C <sub>7</sub> H <sub>8</sub> (Precursor)                      | Hydrocarbon (Aromatic)        | 0.00 | 7.44    | 6.14 $\pm$ 8.45                    | 7.64 $\pm$ 2.08                              |
| 97.006     | Furfural - C <sub>5</sub> H <sub>4</sub> O <sub>2</sub>                  | Carbonyl (Aldehyde) and Furan | 0.40 | 4.65    | 10.33 $\pm$ 4.18                   | 15.64 $\pm$ 2.59                             |
| 107.076    | Xylene - C <sub>8</sub> H <sub>10</sub> (Precursor)                      | Hydrocarbon (Aromatic)        | 0.00 | 6.96    | 3.13 $\pm$ 3.30                    | 2.77 $\pm$ 0.89                              |
| 127.059    | 1,2,3-benzenetriol - C <sub>6</sub> H <sub>6</sub> O <sub>3</sub>        | Hydrocarbon (Aromatic)        | 0.50 | 2.21    | 9.83 $\pm$ 3.80                    | 12.82 $\pm$ 3.82                             |

## S3 Quantitative Analysis of Secondary Organic Aerosols (SOA)

### S3.1 Internal Standard and Sample Preparation

To ensure robust quantification and account for potential analyte loss during extraction or matrix effects during ionization, an internal standard (IS) calibration method was used. All filter samples, blanks, and calibration standards were spiked with 5  $\mu\text{L}$  of (1S)-(+)-camphor-10-sulfonic acid ( $1\text{mg}\cdot\text{L}^{-1}$  in 50/50 acetonitrile/ultrapure water) prior to extraction. Filters were extracted in acetonitrile at room temperature under agitation (1000 rpm, 30 min), filtered at 0.2  $\mu\text{m}$ , and evaporated under a nitrogen stream before being redissolved in 200  $\mu\text{L}$  of a 50/50 acetonitrile/ultrapure water mixture.

### S3.2 Calibration and Linearity

Quantification was performed for five representative markers detected in both scenarios. Calibration curves were generated using a 5-point range (20 to 160 $\text{mg}\cdot\text{L}^{-1}$ ), prepared by spiking pre-pyrolyzed quartz filters to replicate the sample matrix. All analyses were performed in triplicate.

**Table S2: Calibration parameters for the quantified SOA markers.**

| Compound name    | Regression equation     | R <sup>2</sup> |
|------------------|-------------------------|----------------|
| 2-nitrophenol    | $y=1.35\times 10^{-4}x$ | 0.9735         |
| Cis-pinonic acid | $y=3.41\times 10^{-5}x$ | 0.9959         |
| MBTCA            | $y=3.14\times 10^{-4}x$ | 0.9388         |
| Norpinic acid    | $y=1.99\times 10^{-4}x$ | 0.9361         |
| Pinic acid       | $y=1.33\times 10^{-4}x$ | 0.9287         |

Note: x represents the mass in ng and y the ratio of compound/IS response area.

### S3.3 Atmospheric Concentration Calculation

Atmospheric concentrations ( $\text{ng}\cdot\text{m}^{-3}$ ) were determined by dividing the mass quantified on the analysed filter portion by the corresponding volume of air sampled, corrected for the fraction of the total filter surface analysed (typically 1/3 or 1/2 of the filter). Average sampled volumes were  $0.54 \pm 0.02 \text{ m}^3$  for CESAM and  $2.85 \pm 0.10 \text{ m}^3$  for the exposure isolator. The concentration drop observed in the isolators is consistent with the 1:10 dilution ratio applied in the PolluRisk platform.

## S4 Detected SOAs using UPLC/ESI-IMS-QTOF

Table S3: Summary of identified SOA products detected by UPLC/ESI-IMS-QTOFMS.

| No | Tentative Compound name                         | Molecular formula                              | Observed RT (min) | Observed <i>m/z</i> | O:C  | Log(C*) | Volatility | Scenario |
|----|-------------------------------------------------|------------------------------------------------|-------------------|---------------------|------|---------|------------|----------|
| 1  | Levoglucosan isomer                             | C <sub>6</sub> H <sub>10</sub> O <sub>5</sub>  | 0.69              | 161.0457            | 0.83 | -1.95   | LVOC       | BB       |
| 2  | Dihydroxydimethoxyoxane-2-carboxylic acid       | C <sub>8</sub> H <sub>14</sub> O <sub>7</sub>  | 0.74              | 221.0663            | 0.88 | -6.90   | ELVOC      | BB       |
| 3  | 3-Hydroxy-4,4-dimethylglutaric acid (HDMGA)     | C <sub>7</sub> H <sub>12</sub> O <sub>5</sub>  | 2.85              | 176.8950            | 0.71 | -2.31   | LVOC       | BB       |
| 4  | 3-methylbutane-1,2,3-tricarboxylic acid (MBTCA) | C <sub>8</sub> H <sub>12</sub> O <sub>6</sub>  | 3.23              | 203.0558            | 0.75 | -4.78   | ELVOC      | Both     |
| 5  | 3-acetylhexanedioic acid                        | C <sub>8</sub> H <sub>12</sub> O <sub>5</sub>  | 3.43              | 187.0610            | 0.63 | -2.69   | LVOC       | BB       |
| 6  | 5-nitroguaiacol                                 | C <sub>7</sub> H <sub>7</sub> NO <sub>4</sub>  | 3.67              | 169.0135            | 0.57 | -2.04   | LVOC       | BB       |
| 7  | Terpenolic acid                                 | C <sub>8</sub> H <sub>12</sub> O <sub>4</sub>  | 3.72              | 171.0659            | 0.50 | -0.64   | LVOC       | BB       |
| 8  | 5-propyldihydrofuran-2(3H)-one                  | C <sub>7</sub> H <sub>12</sub> O <sub>2</sub>  | 3.93              | 127.0710            | 0.29 | 3.77    | IVOC       | BB       |
| 9  | 10-hydroxypinonic acid                          | C <sub>10</sub> H <sub>16</sub> O <sub>5</sub> | 4.57              | 215.0925            | 0.50 | -3.49   | LVOC       | BB       |
| 10 | Norpinic acid                                   | C <sub>8</sub> H <sub>12</sub> O <sub>4</sub>  | 4.89              | 171.0661            | 0.50 | -0.64   | LVOC       | BB       |
| 11 | 2,3-dihydroxy-4-oxopentanoic acid (DHOPA)       | C <sub>5</sub> H <sub>8</sub> O <sub>5</sub>   | 5.35              | 148.9387            | 1.00 | -1.61   | LVOC       | BB       |
| 12 | Vanillylmandelic acid                           | C <sub>9</sub> H <sub>10</sub> O <sub>5</sub>  | 5.36              | 197.0454            | 0.56 | -3.08   | LVOC       | BB       |
| 13 | 5-butyldihydrofuran-2(3H)-one                   | C <sub>8</sub> H <sub>14</sub> O <sub>2</sub>  | 6.20              | 141.0916            | 0.25 | 3.32    | IVOC       | BB       |
| 14 | Pinic acid                                      | C <sub>9</sub> H <sub>14</sub> O <sub>4</sub>  | 6.20              | 185.0813            | 0.44 | -1.05   | LVOC       | BB       |
| 15 | 5-nitrosalicylic acid (5NSA)                    | C <sub>7</sub> H <sub>5</sub> NO <sub>5</sub>  | 6.45              | 182.0087            | 0.71 | -4.11   | ELVOC      | BB       |
| 16 | Norpinonic acid                                 | C <sub>9</sub> H <sub>14</sub> O <sub>4</sub>  | 7.04              | 185.0867            | 0.44 | -1.05   | LVOC       | BB       |
| 17 | 3-pinalic acid                                  | C <sub>9</sub> H <sub>13</sub> O <sub>3</sub>  | 7.06              | 168.0867            | 0.33 | 0.94    | SVOC       | BB       |
| 18 | 2-nitrophenol                                   | C <sub>6</sub> H <sub>5</sub> NO <sub>3</sub>  | 8.55              | 138.0192            | 0.50 | 0.41    | SVOC       | BB       |
| 19 | 1-(2,2,3-trimethylcyclobutyl)ethan-1-one        | C <sub>9</sub> H <sub>16</sub> O               | 9.10              | 139.1125            | 0.11 | 4.73    | IVOC       | BB       |
| 20 | Cis-pinonic acid                                | C <sub>10</sub> H <sub>16</sub> O <sub>3</sub> | 9.10              | 183.1020            | 0.30 | 0.50    | SVOC       | Both     |
| 21 | 1R-(+)-Nopinone                                 | C <sub>9</sub> H <sub>14</sub> O               | 9.14              | 183.1023            | 0.11 | 4.73    | IVOC       | BB       |
| 22 | Sinapaldehyde                                   | C <sub>11</sub> H <sub>12</sub> O <sub>4</sub> | 9.42              | 207.0661            | 0.36 | -1.90   | LVOC       | BB       |
| 23 | 3-nitrotoluene                                  | C <sub>7</sub> H <sub>7</sub> NO <sub>2</sub>  | 10.51             | 182.0452            | 0.29 | 1.97    | SVOC       | BB       |
| 24 | 3-methyl-4-nitrocatechol                        | C <sub>7</sub> H <sub>7</sub> NO <sub>4</sub>  | 11.23             | 168.0295            | 0.57 | -2.04   | LVOC       | BB       |
| 25 | 2,6,6-trimethylnorpinan-3-one                   | C <sub>10</sub> H <sub>16</sub> O              | 12.15             | 151.1122            | 0.10 | 4.26    | IVOC       | BB       |
| 26 | Benzyl nitrate                                  | C <sub>7</sub> H <sub>7</sub> NO <sub>3</sub>  | 13.01             | 152.0343            | 0.43 | 0.00    | SVOC       | BB       |

|    |                                    |                                                             |       |          |      |       |       |      |
|----|------------------------------------|-------------------------------------------------------------|-------|----------|------|-------|-------|------|
| 27 | 4-nitro-m/o-cresol                 | C <sub>7</sub> H <sub>7</sub> NO <sub>3</sub>               | 13.09 | 152.0347 | 0.43 | 0.00  | SVOC  | BB   |
| 28 | Succinic acid                      | C <sub>4</sub> H <sub>6</sub> O <sub>4</sub>                | 13.15 | 117.9279 | 1.00 | 0.86  | SVOC  | BB   |
| 29 | Norpinonaldehyde                   | C <sub>9</sub> H <sub>14</sub> O <sub>2</sub>               | 13.76 | 153.0914 | 0.22 | 2.87  | IVOC  | BB   |
| 30 | Dimethyl-nitrophenol               | C <sub>8</sub> H <sub>9</sub> NO <sub>3</sub>               | 15.64 | 166.0502 | 0.38 | -0.43 | SVOC  | Both |
| 31 | 4,6-dinitro-o-cresol               | C <sub>7</sub> H <sub>6</sub> N <sub>2</sub> O <sub>5</sub> | 16.10 | 197.0197 | 0.71 | -4.11 | ELVOC | Both |
| 32 | 3-(2-propan-2-yl)pentanedioic acid | C <sub>8</sub> H <sub>14</sub> O <sub>4</sub>               | 26.15 | 173.8707 | 0.50 | -0.64 | LVOC  | BB   |

RT: retention time; C\*: saturation mass concentration at 298 K; Log(C\*) is determined using "UManSysProp" web platform; VOC: volatile organic compounds, IVOC: intermediate-volatility compound, SVOC: semi-volatile organic compound, LVOC: low-volatility organic compound, ELVOC: extremely low-volatility organic compound, BB: biomass burning scenario.



## References

de Gouw, J. and Warneke, C.: Measurements of volatile organic compounds in the earth's atmosphere using proton-transfer-reaction mass spectrometry, *Mass Spectrom Rev*, 26, 223, 2007.

Michoud, V., Sciare, J., Sauvage, S., Dusanter, S., Léonardis, T., Gros, V., Kalogridis, C., Zannoni, N., Féron, A., Petit, J.-E., Crenn, V., Baisnée, D., Sarda-Estève, R., Bonnaire, N., Marchand, N., DeWitt, H. L., Pey, J., Colomb, A., Gheusi, F., Szidat, S., Stavroulas, I., Borbon, A., and Locoge, N.: Organic carbon at a remote site of the western Mediterranean Basin: sources and chemistry during the ChArMEx SOP2 field experiment, *Atmospheric Chem. Phys.*, 17, 8837–8865, <https://doi.org/10.5194/acp-17-8837-2017>, 2017.

Salcedo, D., Onasch, T. B., Dzepina, K., Canagaratna, M. R., Zhang, Q., Huffman, J. A., DeCarlo, P. F., Jayne, J. T., Mortimer, P., Worsnop, D. R., Kolb, C. E., Johnson, K. S., Zuberi, B., Marr, L. C., Volkamer, R., Molina, L. T., Molina, M. J., Cardenas, B., Bernabé, R. M., Márquez, C., Gaffney, J. S., Marley, N. A., Laskin, A., Shutthanandan, V., Xie, Y., Brune, W., Leshner, R., Shirley, T., and Jimenez, J. L.: Characterization of ambient aerosols in Mexico City during the MCMA-2003 campaign with Aerosol Mass Spectrometry: results from the CENICA Supersite, *Atmospheric Chem. Phys.*, 6, 925–946, <https://doi.org/10.5194/acp-6-925-2006>, 2006.
